# Supplementary material
Source: ML conference proceedings conference paper supplement (https://openaccess.thecvf.com/content/ICCV2025/html/Lan_Hybrid-Tower_Fine-grained_Pseudo-query_ICCV_2025_paper.html)
Supplement: Supplementary file 1 [file Lan_Hybrid-Tower_Fine-grained_Pseudo-query_ICCV_2025_supplemental.pdf]

# Hybrid-Tower: Fine-grained Pseudo-query Interaction and Generation for Text-to-Video Retrieval

## Supplementary Material

In this supplementary material, we report additional experimental results which are not included in the main paper due to space limits.

### S1. Evaluation on Million-level Video Datasets

We apply the TRECVID evaluation [1] to our method, which consists of million-scale video datasets. As shown in Tab. S1, our method generalizes well.

| Model              | V3C1         |              |              | V3C2         |              | Mean         |
|--------------------|--------------|--------------|--------------|--------------|--------------|--------------|
|                    | TV19         | TV20         | TV21         | TV22         | TV23         |              |
| CLIP4Clip          | 0.142        | 0.161        | 0.183        | 0.127        | 0.139        | 0.150        |
| CLIP-ViP           | 0.143        | 0.148        | 0.175        | 0.109        | 0.088        | 0.133        |
| <i>F-Pig(Ours)</i> | <b>0.159</b> | <b>0.186</b> | <b>0.216</b> | <b>0.158</b> | <b>0.146</b> | <b>0.173</b> |

Table S1. **Performance comparison.** Metric:  $\inf P$  (higher is better). Training Data: MSRVT-9k. The results for CLIP4Clip and CLIP-ViP are sourced from LPD[2].

### S2. Sensitivity analysis

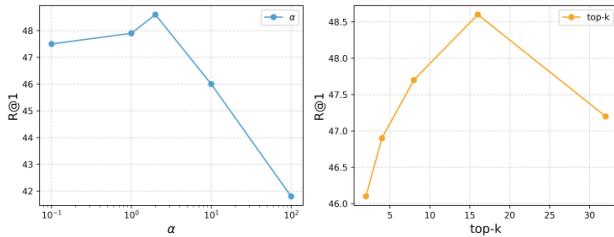

Figure S1. Sensitivity analysis on MSRVT-1k.  $\alpha$ : generation loss weight; top- $k$ : number of selected patch tokens in ITS module.

### S3. Video-to-Text Retrieval Results

We report video-to-text retrieval results on MSRVT-1k and MSRVT-3k, where our method also achieves improved performance, see Tab. S2.

| Model     | MSRVT-1k    |             |             | MSRVT-3k    |             |             |
|-----------|-------------|-------------|-------------|-------------|-------------|-------------|
|           | R@1         | R@5         | R@10        | R@1         | R@5         | R@10        |
| CLIP4Clip | 41.4        | 70.6        | 80.5        | 50.8        | 78.5        | 87.0        |
| TS2-Net*  | 41.4        | 68.0        | 77.8        | 53.0        | 82.5        | 89.8        |
| X-CLIP*   | 43.4        | 72.2        | 82.6        | 56.1        | 84.3        | 92.3        |
| CLIP-ViP  | 44.5        | 73.1        | 81.7        | 54.6        | 84.1        | <b>92.7</b> |
| TeachCLIP | 44.3        | <b>73.6</b> | <b>83.7</b> | 55.2        | 81.9        | 90.3        |
| PIG       | <b>47.5</b> | 72.9        | 82.2        | <b>56.6</b> | <b>84.5</b> | 92.1        |

Table S2. **Video-to-text retrieval results.** Models marked by belong to Single-Tower methods. Backbone: CLIP-ViT-B/32.

| Item                    | Setting                              |
|-------------------------|--------------------------------------|
| GPUs                    | 8 NVIDIA 3090                        |
| Backbone                | CLIP (ViT-B/32, ViT-B/16)            |
| Initialization          | Open I-released CLIP                 |
| Learning rate (stage 1) | 9e-5 (generator pretraining)         |
| Learning rate (stage 2) | 1e-6 (full fine-tuning)              |
| Weight decay            | 0.2                                  |
| Optimizer               | adamW [3]                            |
| Learning rate schedule  | Cosine annealing [4] + warmup (0.01) |
| Epochs                  | 100                                  |
| Input frame size        | 224 224                              |
| Max. frame/word tokens  | 12 / 50                              |
| Batch size              | 128                                  |
| DiDeMo tokens           | 32/64 [5]                            |
| Top-k                   | 16                                   |

Table S3. Implementation Details.

### S4. Implementation Details

We list more implementation details, see Tab. S3. Our models are initialized from: <https://huggingface.co/openai/clip-vit-b-se-p-tch32>, <https://huggingface.co/openai/clip-vit-b-se-p-tch16>.

### References

- [1] George Wad, Keith Curtis, Sad Butt, Jonathan Fiscus, Fzal Godil, Yooyoung Lee, Andrew Delgado, Eliot Godard, Lukas Diduch, Yvette Graham, et al. Trecvid 2023-a series of evaluation tracks in video understanding. In *Proceedings of TRECVID, 2023*. 1
- [2] Fan Hu, Zijie Xin, and Xirong Li. Learning partially-decorrelated common spaces for ad-hoc video search. In *Pro-*

*ceedings of the 33rd ACM International Conference on Multimedia*, 2025. [1](#)

- [3] Ilya Loshchilov and Frank Hutter. Decoupled weight decay regularization. In *ICLR*, 2019. [1](#)
- [4] Ilya Loshchilov and Frank Hutter. Sgdr: Stochastic gradient descent with warm restarts. In *ICLR*, 2022. [1](#)
- [5] Hongwei Xue, Yuchong Sun, Bei Liu, Jianlong Fu, Ruihua Song, Houqiang Li, and Jiebo Luo. Clip-vip: Adapting pre-trained image-text model to video-language alignment. In *ICLR*, 2023. [1](#)
